# Supplementary material for: Dilute but significant: low cation concentration affects field dependent properties of Eu2Ga11Sn35
Source: Royal Society of Chemistry journal article supplement (doi:10.1039/d4cc02104e), 2024-01-01
Supplement: d4cc02104e1.pdf [file d4cc02104e1.pdf]

*Supplementary Information*

**Dilute but significant: Low cation concentration affects  
field dependent properties of  $\text{Eu}_2\text{Ga}_{11}\text{Sn}_{35}$**

Wilarachchige D. C. B. Gunatilleke,<sup>1</sup> and George S. Nolas\*<sup>1</sup>

<sup>1</sup>Department of Physics, University of South Florida, Tampa, FL 33620, USA

## Material Characterization

Single crystals of  $\text{Eu}_2\text{Ga}_{11}\text{Sn}_{35}$  were obtained using the synthesis method previously reported <sup>1</sup>. Table S1 provides the single crystal structure refinement results. The crystallographic data for  $\text{Eu}_2\text{Ga}_{11}\text{Sn}_{35}$  is available from the Cambridge Crystallographic Database under CCDC 2154399. The stoichiometry of the composition was further analyzed by a JEOL JSM-6390LV Scanning Electron Microscope (SEM) equipped with an Oxford INCA X-Sight 7852 for Energy Dispersive Spectroscopy (EDS) corroborating the single crystal X-ray diffraction results. The homogeneity of the obtained crystals was confirmed by EDS elemental mapping of several crystal surfaces as shown in Figure S1.

## Temperature and Field Dependent Magnetic, Electrical and Thermal Properties Measurements

The Dynacool Physical Property Measurement System (PPMS) from Quantum Design was used for temperature and field dependent measurements from 300 K to 2 K. The Vibrating Sample Magnetometer (VSM) module, resistivity module, Thermal Transport Option (TTO) module and Heat Capacity (HC) module were used to measure the field dependent magnetization,  $M$ , temperature dependent magnetic susceptibility,  $\chi$ , Hall coefficient,  $R_h$ , the thermal conductivity,  $\kappa$ , thermopower,  $\alpha$ , electrical resistivity,  $\rho$ , and the isobaric heat capacity,  $C_p$ , respectively. The magnetization of the specimen was measured at 1.8 K, 3.5 K, 5 K, 10 K and 300 K from -7 T to 7 T. Zero field cooled (ZFC) and field cooled (FC)  $\chi$  was measured under an applied magnetic field of 9 T from 1.8 K to 250 K, as shown in Figure S2. The  $\rho$  and  $\kappa$  measurements were performed at 0T, 6.75 T and 9 T from 300 K to 5 K in a two-probe configuration under continuous sweep mode at a rate of 0.5 K/min. The crystal was attached to the TTO module using Au coated manganin leads using Ag epoxy (H20E). Temperature-dependent  $C_p$  was measured at 0 T and 9 T employing the heat capacity option (HC) of the PPMS. Thermal N-grease was used to couple the crystal with the mounting stage of the HC module. The measurements were performed with a 2% temperature rise. The two-tau model of the Quantum Design heat capacity software was used for the measurements. Appropriate addendum measurements preceded the heat capacity measurements. Maximum experimental uncertainties of 7%, 5%, 5% and 3% were calculated for  $\kappa$ ,  $\alpha$ ,  $\rho$ , and  $C_p$ , respectively.

**Table S1.** Crystal data and structure refinement data.

|                                                                    |                                                                        |
|--------------------------------------------------------------------|------------------------------------------------------------------------|
| Empirical formula                                                  | Eu <sub>2.2(2)</sub> Ga <sub>11.0(2)</sub> Sn <sub>35.0(2)</sub>       |
| Formula weight                                                     | 5258.42                                                                |
| Temperature/K                                                      | 298 K                                                                  |
| Crystal system, Space group                                        | cubic, $Pm\bar{3}n$                                                    |
| $a/\text{\AA}$ , Volume/ $\text{\AA}^3$                            | 11.9497(5), 1706.4(7)                                                  |
| $Z$ , $\rho_{\text{calc}}/\text{g cm}^{-3}$                        | 1, 5.117                                                               |
| $\mu/\text{mm}^{-1}$ , $F(000)$                                    | 18.020, 2231                                                           |
| Crystal size/ $\text{mm}^3$                                        | 0.12 x 0.11 x 0.06                                                     |
| Radiation, $2\theta$ range for data collection/ $^\circ$           | Synchrotron ( $\lambda = 0.41328 \text{\AA}$ ), 2.0 to 31.14           |
| Index ranges                                                       | $-15 \leq h \leq 15$ , $-15 \leq k \leq 15$ , $-15 \leq l \leq 15$     |
| Reflections collected, Independent reflections                     | 39436, 380 [ $R_{\text{int}} = 0.0646$ , $R_{\text{sigma}} = 0.0098$ ] |
| Data/restraints/parameters                                         | 380/1/21                                                               |
| Goodness-of-fit on $F^2$ , Final R indexes [ $I \geq 4\sigma(I)$ ] | 1.225, $R_1 = 0.0095$ , $wR_2 = 0.0216$                                |
| Largest diff. peak/hole / $e \text{\AA}^{-3}$                      | 0.55/-0.36                                                             |

$$R_1 = \frac{\sum ||F_o| - |F_c||}{\sum |F_o|}, wR_2 = \left[ \frac{\sum w(F_o^2 - F_c^2)^2}{\sum w(F_o^2)^2} \right]^{1/2}$$

\*  $U_{\text{eq}}$  is defined as one third of the trace of the orthogonalized  $U_{ij}$  tensor.

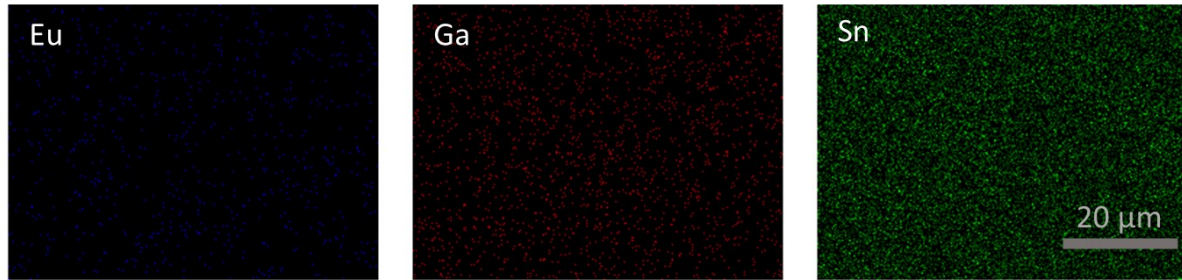**Figure S1.** EDS elemental mapping of a surface of a representative crystal of Eu<sub>2</sub>Ga<sub>11</sub>Sn<sub>35</sub>.

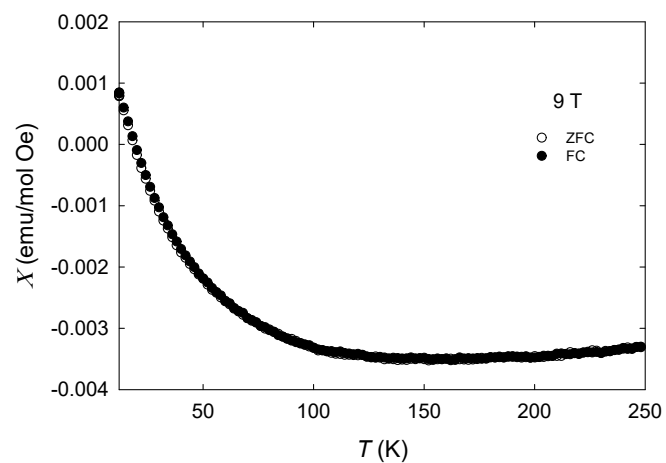

**Figure S2.** Zero field cooled and field cooled  $\chi$ .

## References

- 1 W. D. C. B. Gunatilleke, W. Wong-Ng, P. Y. Zavalij, M. Zhang, Y.-S. Chen and G. S. Nolas, *CrystEngComm*, 2023, **25**, 48–52.
